# Supplementary material
Source: PubMed Central journal article supplement (PMC8653094)
Supplement: CEA-52-167-s001.pdf [file CEA-52-167-s001.pdf]

**Dear CHOICE participant,**

**We would like to evaluate the impact COVID's first wave in your clinical practice and prescription of aeroallergen immunotherapy.**

**You need to put your CHOICE's doctor code. If you don't have it, please contact the survey manager in this email address ([choice.onlinesurvey@gmail.com](mailto:choice.onlinesurvey@gmail.com)). If you hadn't had the chance to do it before, please complete the original CHOICE Doctor's Questionnaire to complete your registration to in the study, you can do so in this link ([click here for Doctor Questionnaire](#))**

**We are very grateful for your collaboration. For any questions, please contact us at survey email address ([choice.onlinesurvey@gmail.com](mailto:choice.onlinesurvey@gmail.com)).**

**We would appreciate if you could answer the below questions, it will take less than 9 minutes.**

\* 1. Please, insert your 5 digits doctor code

\* 2. Please, select your country:

France

Spain

\* 3. Did you directly handle COVID infected patients?

Yes

No

\* 4. Did you get COVID disease?

Yes

No

Not sure

## SECTION I

Refers to the phase when **FULL CONFINEMENT** was established

\* 5. What was the duration of the full-confinement period expressed in **WEEKS**, in your area?

\* 6. During the full-confinement period, have you attended allergic patients ( i.e. telemedicine or in person)

Yes

No

## SECTION I

### Refers to the phase when **FULL CONFINEMENT** was established

\* 7. Could you estimate if the **number of respiratory allergy patients referred** to you has changed compared to the same period of the previous year?

- No, I have attended approximately the same number of respiratory allergy patients
- Yes, I have attended around 75% of patients with respiratory allergy compared to last year
- Yes, I have attended around 50% of patients with respiratory allergy compared to last year
- Yes, I have attended around 25% of patients with respiratory allergy compared to last year
- Yes, I have not attended any patients with respiratory allergy

\* 8. During the full confinement period, regarding **NEW AIT prescriptions**

- I have not changed the number of new prescriptions compared to same period last year
- I have prescribed around 75% of new AIT courses I did last year for the same period
- I have prescribed around 50% of new AIT courses I did last year for the same period
- I have prescribed around 25% of new AIT courses I did last year for the same period
- I have not prescribed AIT at all

\* 9. For the **NEW AIT prescriptions**, have you changed any of the following (several can be marked)

- Not applicable, I have not prescribed any new AIT courses
- I have not changed my prescription patterns by any means
- I have prescribed SCIT more often than previously
- I have prescribed SLIT more often than previously
- I have prescribed pre/coseasonal schemes more often
- I have prescribed perennial schemes more often

Other (please specify)

\* 10. For your **MAINTENANCE SCIT** patients without COVID infection, during the full confinement period, select which strategies you have followed (more than one can be selected):

- I do not prescribe SCIT
- I have recommended them to continue with their administration as usual
- I have recommended them to continue with their administration in a different setting
- I have recommended them to switch to SLIT
- I have recommended them to pause their treatment
- I have recommended them to withdraw their treatment

Other (please specify)

\* 11. For your **MAINTENANCE SLIT** patients without COVID infection, during the full confinement period, select which strategies you have followed (more than one can be selected):

- I do not prescribe SLIT
- I have recommended them to continue with their administration as usual
- I have recommended them to switch to SCIT
- I have recommended them to pause their treatment
- I have recommended them to withdraw their treatment

Other (please specify)

## SECTION II

### Refers to the phase when full confinement WAS DISCONTINUED

\* 12. After full confinement, could you estimate if the **number of respiratory allergy patients referred to you** has changed compared to the same period of the previous year?

- No, I have attended approximately the same number of respiratory allergy patients
- Yes, I have attended around 75% of patients with respiratory allergy compared to last year
- Yes, I have attended around 50% of patients with respiratory allergy compared to last year
- Yes, I have attended around 25% of patients with respiratory allergy compared to last year
- Yes, I have not attended any patients with respiratory allergy

\* 13. After the full confinement period, regarding **NEW AIT prescriptions**

- I have not changed the number of new prescriptions compared to same period last year
- I have prescribed around 75% of new AIT courses I did last year for the same period
- I have prescribed around 50% of new AIT courses I did last year for the same period
- I have prescribed around 25% of new AIT courses I did last year for the same period
- I have not prescribed AIT at all

\* 14. For the **NEW prescriptions**, have you changed any of the following (several can be marked)

- Not applicable, I have not prescribed any new AIT courses
- I have not changed my prescription patterns by any means
- I have prescribed SCIT more often than previously
- I have prescribed SLIT more often than previously
- I have prescribed pre/coseasonal schemes more often
- I have prescribed perennial schemes more often

Other (please specify)

\* 15. For the **NEW prescriptions**, has the confinement suffered by the patients influenced the clinical data that you had in order to prescribe AIT?

- Patient's confinement did not influence the clinical data I used to prescribe AIT
- Patient's confinement did have a small influence in the clinical data I used to prescribe AIT
- Patient's confinement did have a significant influence in the clinical data I used to prescribe AIT
- Patient's confinement did have a big influence in the clinical data I used to prescribe AIT

\* 16. For your **MAINTENANCE SCIT** patients without COVID infection, after the full confinement period, to which extent you have followed the next strategies?:

|                                                                                      | 1<br>(never)          | 2                     | 3                     | 4                     | 5<br>(always)         | N/A, I<br>don't<br>use<br>SCIT |
|--------------------------------------------------------------------------------------|-----------------------|-----------------------|-----------------------|-----------------------|-----------------------|--------------------------------|
| I have recommended them to continue with their administration as usual               | <input type="radio"/>          |
| I have recommended them to continue with their administration in a different setting | <input type="radio"/>          |
| I have recommended them to switch to SLIT                                            | <input type="radio"/>          |
| I have recommended them to pause temporarily their treatment                         | <input type="radio"/>          |
| I have recommended them to withdraw their treatment                                  | <input type="radio"/>          |

\* 17. For your **MAINTENANCE SLIT** patients without COVID infection, after the full confinement period, to which extent you have followed the next strategies?:

|                                                                        | 1<br>(never)          | 2                     | 3                     | 4                     | 5<br>(always)         | N/A, I<br>don't<br>use<br>SLIT |
|------------------------------------------------------------------------|-----------------------|-----------------------|-----------------------|-----------------------|-----------------------|--------------------------------|
| I have recommended them to continue with their administration as usual | <input type="radio"/>          |
| I have recommended them to switch to SCIT                              | <input type="radio"/>          |
| I have recommended them to pause temporarily their treatment           | <input type="radio"/>          |
| I have recommended them to withdraw their treatment                    | <input type="radio"/>          |

\* 18. Have you somehow perceived any change in the attitude of new patients towards AIT?

- You feel them somehow more reluctant to receive AIT
- You don't feel them showing a different attitude to AIT
- You perceive they are more likely to receive AIT
- I don't know

\* 19. Please, insert your doctor code

20. Thank you for completing this questionnaire. If there is anything you'd like to comment on the impact of COVID disease and your prescription patterns, please, include it here
